# Supplementary material for: Focal adhesion-generated cues in extracellular matrix regulate cell migration by local induction of clathrin-coated plaques
Source: bioRxiv or medRxiv preprint supplement (doi:10.1101/493114), 2018-12-11
Supplement: Supplementary file [file media-1.pdf]

1 **Supplementary Information: Focal adhesion-generated cues in**  
2 **extracellular matrix regulate cell migration by local induction of**  
3 **clathrin-coated plaques**

4 ***Supplementary Movies***

5 **Supplementary Movie 1: Switch from FAs to clathrin-coated plaques during cell**  
6 **migration.** Live-cell confocal spinning disc microscopy of U373 stably expressing AP2-  
7 eGFP (green) and transiently expressing mCherry-zyxin (red). Scale bar: 10µm. Movie time  
8 is displayed in the top left corner.

9 **Supplementary Movie 2: Disassembly of clathrin-coated plaques by integrin**  
10 **inhibition.** Live-cell confocal spinning disc microscopy of U373 stably expressing AP2-eGFP  
11 treated with Cilengitide (10 µM) for 20 minutes. Scale bar: 10µm. Movie time is displayed in  
12 the top left corner.

13

14 **Supplementary Movie 3: Switch from FAs to clathrin-coated plaques at local gelatin**  
15 **digestions during cell migration.** Live-cell confocal spinning disc microscopy of U373  
16 stably expressing AP2-eGFP (green) and transiently expressing mCherry-zyxin (red) on  
17 coverslips coated with Alexa Fluor 647-labelled gelatin (blue). Scale bar: 10µm. Movie time  
18 is displayed in the top left corner.

19

20 **Supplementary Movie 4: Clathrin-coated plaque formation at local gelatin digestions.**  
21 Live-cell confocal spinning disc microscopy of U373 stably expressing AP2-eGFP (green) on  
22 coverslips coated with Alexa Fluor 647-labelled gelatin (blue). Scale bar: 10µm. Movie time  
23 is displayed in the top left corner.

24

25 **Supplementary Movie 5: Formation of clathrin-coated plaques in two migrating cells**  
26 **at the same local gelatin digestions.** Live-cell confocal spinning disc microscopy of two  
27 U373 stably expressing AP2-eGFP (green) and transiently expressing mCherry-zyxin (red)  
28 on coverslips coated with Alexa Fluor 647-labelled gelatin (blue). Scale bar: 10µm. Movie  
29 time is displayed in the top left corner.

30

31 **Supplementary Movie 6: Switch from FAs to clathrin-coated plaques during ROCK**  
32 **inhibition.** Live-cell confocal spinning disc microscopy of representative U373 cell stably  
33 expressing AP2-eGFP (green) and transiently expressing mCherry-zyxin (red) treated with  
34 Y-27632 (10 µM) for 30 minutes. Scale bar: 10µm. Movie time is displayed in the top left  
35 corner.

36

37 **Supplementary Movie 7: Switch from FAs to clathrin-coated plaques during myosin-II**  
38 **inhibition.** Live-cell confocal spinning disc microscopy of representative U373 cell stably  
39 expressing AP2-eGFP (green) and transiently expressing mCherry-zyxin (red) treated with  
40 Blebbistatin (20 µM) for 30 minutes. Scale bar: 10µm. Movie time is displayed in the top left  
41 corner.

42

43 **Supplementary Movie 8: Clathrin-coated plaques form at topographical cues.** Spinning  
44 disc confocal microscopy of U373 stably expressing AP2-eGFP (right) growing on optically  
45 clear 3D-micropatterns (DIC, left). Scale bar: 10µm. Movie time is displayed in the top left  
46 corner.

47

48 **Supplementary Movie 9: FAs disassembly in U373 shEPS15/R during ROCK inhibition.**

49 Live-cell confocal spinning disc microscopy of representative U373 shEPS15/R cell stably  
50 expressing AP2-eGFP (green) and transiently expressing mCherry-zyxin (red) treated with  
51 Y-27632 (10  $\mu$ M) for 30 minutes. Scale bar: 10 $\mu$ m. Movie time is displayed in the top left  
52 corner.

53

54 ***Supplementary Materials and Methods***

55 ***EM and CLEM of clathrin structures using metal replicas of unroofed membrane***  
56 ***sheets***

57 EM and CLEM of clathrin structures were performed as previously described<sup>1</sup>. Cells were  
58 seeded on PDL-coated coverslips (25 mm). Unroofing was performed 16 hours after  
59 seeding. The cells were washed three times with stabilisation buffer (30 mM HEPES pH 7.4,  
60 70 mM KCl, 5 mM MgCl<sub>2</sub>). Unroofing was performed in 2% paraformaldehyde (PFA) in  
61 stabilisation buffer using two short sonication pulses. Samples were immediately put into  
62 fresh 2% PFA solution and fixed for 20 minutes at room temperature.

63 For CLEM, widefield epifluorescence microscopy of unroofed plasma membranes from AP2-  
64 eGFP expressing cells was performed with a Nikon N-STORM microscope with a 100x oil  
65 immersion objective and an EMCCD camera (Andor Ixon Ultra DU-897). To cover an area of  
66 1 mm<sup>2</sup> a montage of 15 x 15 images with an overlap of 15% for stitching was taken. The  
67 imaged area was marked with a circle (4 mm in diameter) around the centre of the imaged  
68 area using an objective diamond scribe. The immersion oil was carefully removed from the  
69 bottom of the glass coverslip and the sample was prepared for EM.

70 Coverslips with unroofed membranes were fixed with 2% glutaraldehyde in PBS overnight.  
71 Samples were incubated with 0.1% tannic acid for 20 minutes at room temperature. After  
72 four washes with water, the samples were incubated with 0.1% uranyl acetate for  
73 20 minutes at room temperature. After two washes with water, samples were dehydrated  
74 with a series of ethanol solutions (15% - 100%). Samples were placed in each ethanol  
75 solution for 5 minutes. After replacing the 100% ethanol solution, the samples were dried  
76 in a critical point dryer. The samples were then put under vacuum until they were coated.  
77 The samples were coated with JFDV JOEL Freeze Fracture Equipment with a first layer of  
78 platinum with an angle of 17° while rotating and with a second layer of carbon with an  
79 angle of 90° while rotating. For better orientation, the marked area of the coated samples  
80 were imaged with a phase contrast microscope. The samples were then cut to fit on EM  
81 grids (TED PELLA, 75 Mesh Copper, Support Films Formvar/Carbon). 5% hydrofluoric acid  
82 was used to remove the glass from the metal replica. The floating metal replica was  
83 extensively washed with water and then carefully placed on a glow discharged EM grid.

84 Samples were dried on filter paper and again imaged with a phase contrast microscope.  
85 TEM imaging was performed using a JEOL 1400 equipped with SerialEM freeware for  
86 montaging. Montages of large membrane sheets at 12,000 magnification (1.82 nm per pixel)  
87 with 10% overlap were imaged.

### 88 ***Transformation of images for CLEM***

89 Transformation of images for CLEM was performed as previously described<sup>1</sup>. The FM image  
90 and the EM montage of the same membrane sheet were first manually and roughly overlaid  
91 using Photoshop. MATLAB was used to transform the fluorescence image according to the  
92 EM montage using three manually identified clathrin-coated structures. For the  
93 transformation, the centre of the clathrin structure in the electron microscope montage and  
94 the centre of the fluorescence signal determined by a Gaussian fit were used as landmarks.

### 95 ***TEM and CLEM analysis of clathrin coats***

96 Analysis of TEM and CLEM data was performed as previously described<sup>1</sup>. For the TEM  
97 analysis, clathrin-coated structures were manually identified. The projected area was  
98 measured by outlining their surrounding using ImageJ/Fiji (<https://fiji.sc>). Classification  
99 into flat, dome, pit and flat with budding dome/pit structures was done by visual evaluation  
100 of their curvature. Flat structures could be distinguished from curved structures. Within the  
101 curved coats, pit structures were discriminated from dome structures by the existence of a  
102 highly contrasted surrounding ring, which represents a constricted neck. The circularity of  
103 the outlines of clathrin-coated structures was measured using the shape descriptors tool in  
104 ImageJ/Fiji. For the CLEM analysis, the fluorescent intensity was correlated to clathrin-  
105 coated structures identified in TEM.

### 106 ***Live-cell microscopy of CME at bottom and top plasma membrane***

107 For live-cell microscopy of CME at the bottom and top plasma membrane, cells stably  
108 expressing AP2-eGFP were seeded on PDL-coated coverslips. Cleaned coverslips were  
109 sterilized with ethanol and washed three times with PBS. Coverslips were inverted on a  
110 drop of PDL hydrobromide (mol wt 70,000 - 15,000, 0.01% (w/v) in H<sub>2</sub>O; Sigma, P6407)  
111 and incubated for 5 minutes at room temperature followed by three washes with H<sub>2</sub>O. CME  
112 dynamics at bottom and top plasma membrane of the same cell were imaged with live-cell

113 spinning disc confocal microscopy 12 hours post-seeding. Therefore, first AP2-eGFP  
114 dynamics were monitored for 10 minutes with a frame rate of 5 seconds at the bottom  
115 plasma membrane. Afterwards CME dynamics of the top plasma membrane were imaged by  
116 taking a z-stack of five images covering 2  $\mu\text{m}$  in height of the very top of the cell with a rate  
117 of 5 seconds between the z-stacks. Maximum projections of each z-stack were generated  
118 and further used for tracking of CME at the top plasma membrane.

### 119 ***Generation of adhesive micropatterns by photo-patterning***

120 Adhesive micropatterns have been generated by photo-patterning as previously described<sup>2</sup>.  
121 In brief, an UVO-cleaner (Model 342, Jelight) was used to illuminate samples with deep UV.  
122 A synthetic quartz mask with customized features was purchased from Toppan. Coverslips  
123 were activated by illuminating with deep UV for 10 minutes. For passivation, the coverslips  
124 were inverted on a drop of 0.1 mg/ml Poly(L-lysine)-graft-poly(ethylene glycol) co-polymer  
125 (PLL-g-PEG) (SuSoS Surface Technology, PLL(20)-g[3.5]-PEG(2)) in 10 mM HEPES (pH 7.4)  
126 (50  $\mu\text{l}$  for 12 mm diameter coverslips; 100  $\mu\text{l}$  for 24 mm diameter coverslips) and incubated  
127 for 30 minutes. To visualize passivated areas, a 1:1 mix of unlabelled and Atto633-labelled  
128 PLL-g-PEG (SuSoS Surface Technology, PLL(20)-g[3.5]-PEG(2)-Atto633) was used.  
129 Passivated coverslips were washed with H<sub>2</sub>O for 10 minutes. Before usage the quartz mask  
130 was washed with acetone and isopropanol and dried. The quartz mask was activated by  
131 illuminating with deep UV for 5 minutes on the metal bearing side to clean the surface and  
132 make it hydrophilic. A drop of 4  $\mu\text{l}$  of millipore H<sub>2</sub>O was put on the quartz mask and the  
133 coverslip was placed on the drop with the pegylated side facing down. Air bubbles were  
134 removed by pressing the coverslip against the mask. Deep UV was illuminated for 3 minutes  
135 through the mask with the quartz side facing the light source. After illumination, an excess  
136 of H<sub>2</sub>O was used to remove coverslips from the quartz mask by floating. The coverslips were  
137 washed with PBS and directly used for experiments.

### 138 ***Surface topography measurements using AFM***

139 AFM measurements were performed on a MultiMode 8 (Bruker). For topography  
140 measurements, an area of 12  $\mu\text{m}$  x 12  $\mu\text{m}$  of the surface was scanned in peak force tapping  
141 mode with a scanasyst-air cantilever (resonant frequency 70 kHz, spring constant 0.4 N/m,  
142 tip radius 5-10 nm; Bruker). AFM images were processed using gwyddion

143 (<http://gwyddion.net>). Line profiles were computed by averaging profiles of 1-3  $\mu\text{m}$  along  
144 the gratings.

145 **Supplementary Figures**

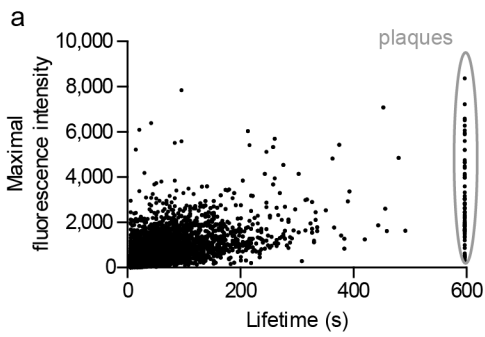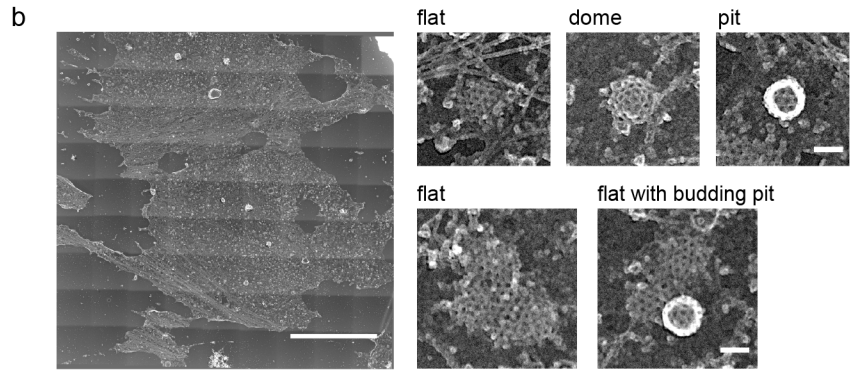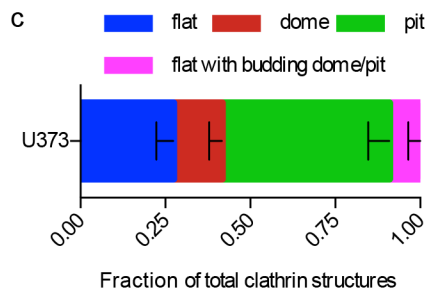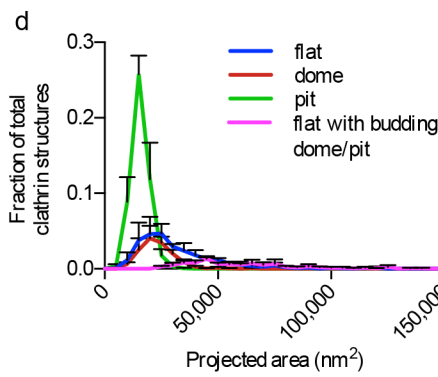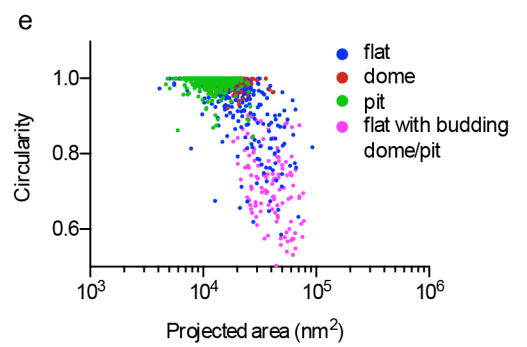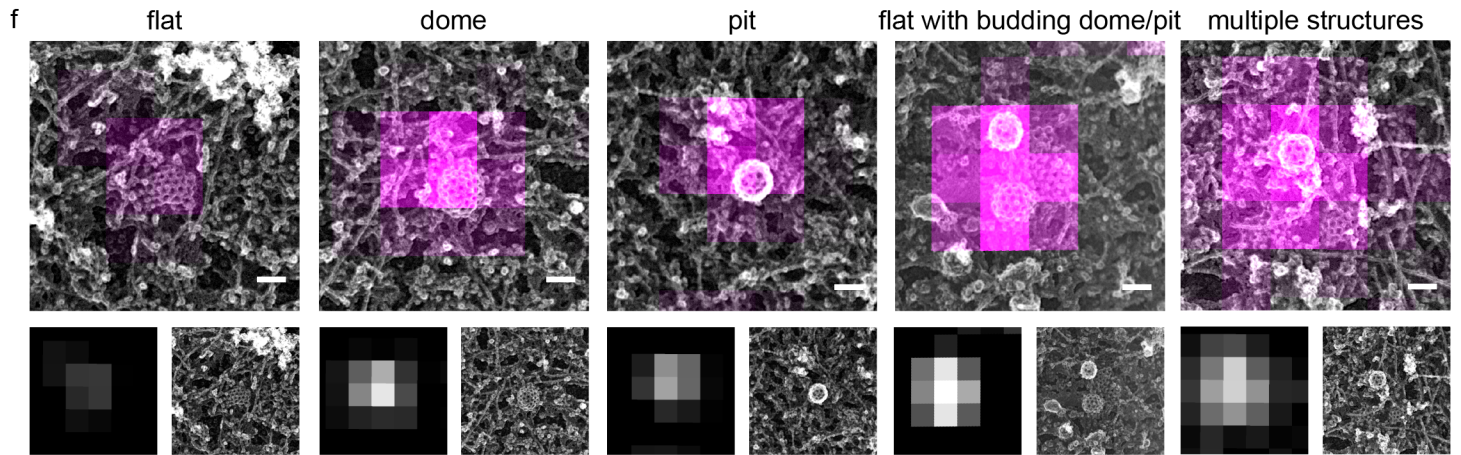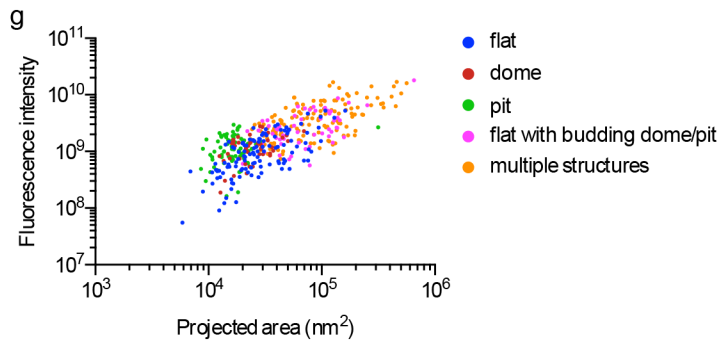



146 **Supplementary Figure 1: Dynamical and morphological characterization of clathrin**  
147 **structures in U373 cells.**

148 (a) Lifetime versus maximal fluorescence intensity of AP2-eGFP of CME in U373 cells.  
149 Persistent clathrin-coated plaques are marked by a grey circle. Shown is a plot of a  
150 representative cell. Each dot represents one tracked CME event of a 10 minute long movie.  
151 (b) TEM of metal replicas of unroofed plasma membrane sheets from of U373. Left:  
152 Overview of whole membrane. Right: Zooms on representative examples of morphological  
153 categories found in the U373 cells: Flat, dome, pit, and flat with budding dome/pit. Scale  
154 bar: 10  $\mu\text{m}$  (overview); 100 nm (zooms). (c) Fraction of flat (blue), dome (red), pit (green),  
155 and flat with budding dome/pit (magenta) clathrin-coated structures on plasma membrane  
156 sheets. Results are calculated from four different membranes. Total number of clathrin-  
157 coated structures: 3,627. Means with SD are shown. (d) Projected area distribution of the  
158 different clathrin morphologies found on plasma membrane sheets of U373. Means with SD  
159 are shown. (e) Circularity and size of clathrin-coated structures with different  
160 morphologies. Each dot represents one clathrin coat. Shown are the results of one  
161 representative plasma membrane sheet. (f) Examples of flat, dome, pit, flat with budding  
162 dome/pit, and multiple structures, which cannot be distinguished by FM, observed with  
163 CLEM. Top panel: CLEM, lower left: fluorescence microscopy, lower right: TEM. Scale bar:  
164 100 nm. This panel has been adapted from Bucher *et al.*, 2018<sup>1</sup>. Published by Springer  
165 Nature Limited under a Creative Commons Attribution 4.0 International Licence  
166 (<http://creativecommons.org/licenses/by/4.0/>). (g) Correlation of size and AP2-eGFP  
167 fluorescence intensity of all clathrin structures categorized by their morphologies  
168 (flat (blue), dome (red), pit (green), flat with budding dome/pit (magenta), and multiple  
169 structures (orange)). Graph shows representative CLEM analysis of one plasma membrane  
170 sheet of U373. Total number of clathrin structures: 427.

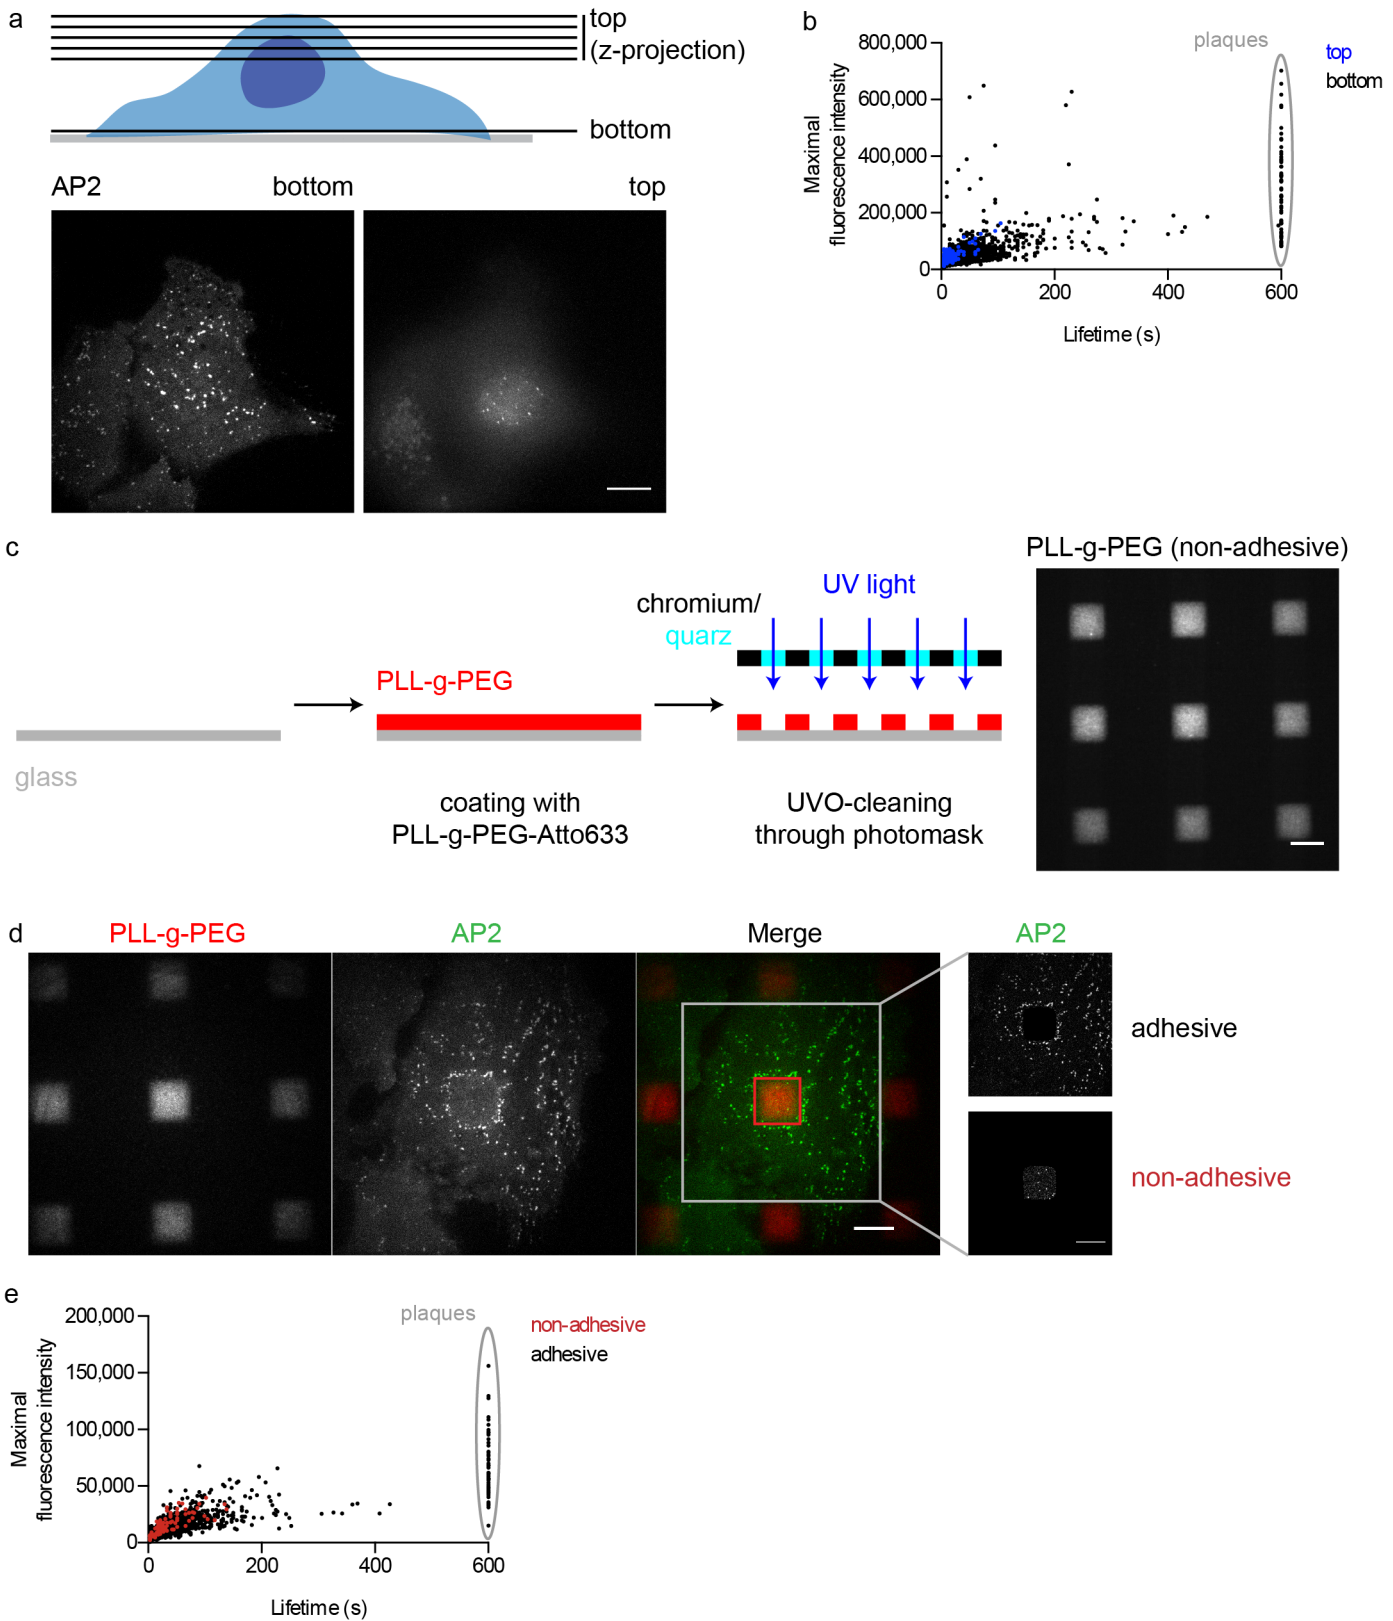

171 **Supplementary Figure 2: Clathrin-coated plaques form exclusively at attached plasma**  
 172 **membrane parts.**

173 (a) Schematic of imaging of CME at bottom and top plasma membrane. AP2-eGFP was  
174 imaged at the bottom plasma membrane in a single focal plane, for 10 minutes with a frame  
175 rate of 5 seconds. The top plasma membrane was imaged by taking a z-stack of 5 images  
176 with a spacing of 0.5  $\mu\text{m}$  at the very top of the same cell. For tracking of CME on the top  
177 plasma membrane, a maximal intensity z-projection was used. Scale bar: 10  $\mu\text{m}$ . (b) Lifetime  
178 versus maximal fluorescence intensity of AP2-eGFP of CME tracks from the top (blue) and  
179 the bottom (black) plasma membrane of a representative U373 cell. Each dot represents  
180 one tracked CME event of a 10 minute long movie. Persistent clathrin-coated plaques are  
181 marked by a grey circle. Number of tracks at bottom PM: 1,874. Number of tracks at top PM:  
182 118. (c) Schematic illustrates the production of adhesive micropatterns using photo-  
183 patterning. First, glass coverslips were passivated by coating with Atto633-labelled PLL-g-  
184 PEG. Spatially controlled UVO-cleaning through a photomask was performed to generate a  
185 micropattern of adhesive and non-adhesive regions. Right: Image of the adhesive  
186 micropattern used in this experiment consisting of 10  $\mu\text{m}$  x 10  $\mu\text{m}$  squares of PLL-g-PEG  
187 with a spacing of 10  $\mu\text{m}$ . Scale bar: 10  $\mu\text{m}$ . (d) Example of a U373 cell stably expressing AP2-  
188 eGFP (green) growing on an adhesive micropattern of Atto633-labelled PLL-g-PEG (red).  
189 Adhesive (black) and non-adhesive (red) areas separated by the PLL-g-PEG signal for  
190 further analysis of CME dynamics. Scale bars: 10  $\mu\text{m}$ . (e) Lifetime versus maximal  
191 fluorescence intensity of AP2-eGFP of CME tracks from adhesive (black) and non-  
192 adhesive (black) areas of a representative cell. Each dot represents one tracked CME event  
193 of a 10 minute long movie. Persistent clathrin-coated plaques are marked by a grey circle.  
194 Number of tracks at the attached plasma membrane part: 2,849, at the non-attached plasma  
195 membrane part: 87.

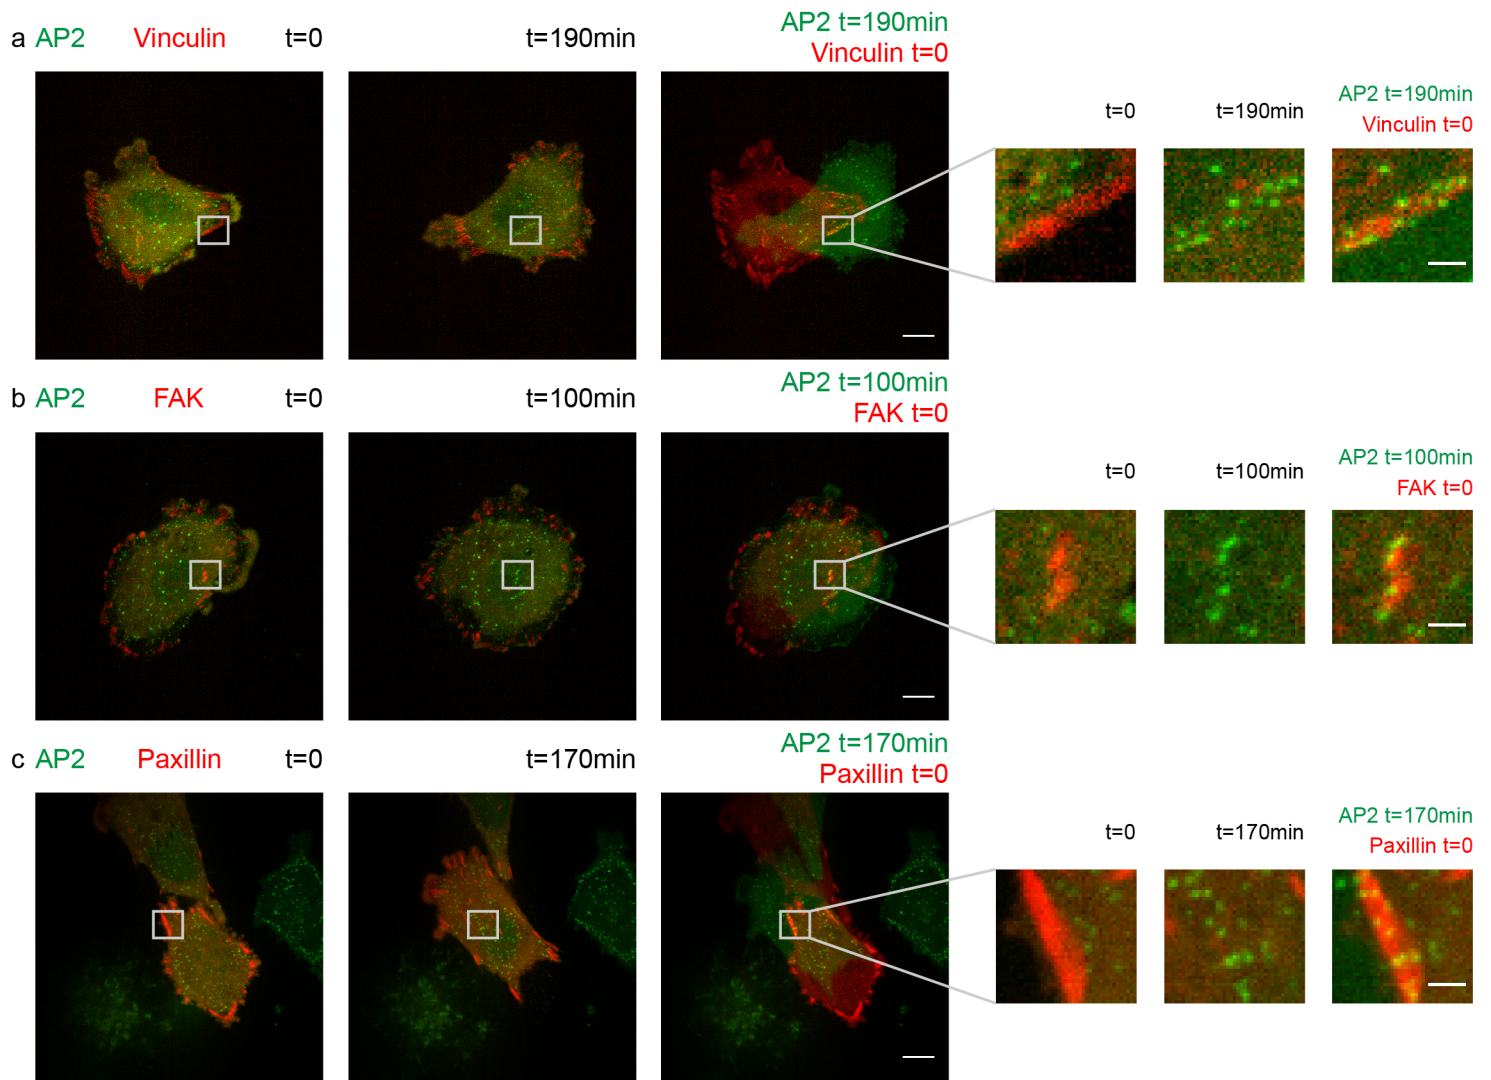

196 **Supplementary Figure 3: Different FA markers show switch from FAs to clathrin-**  
 197 **coated plaques during cell migration.**

198 Live-cell confocal spinning disc microscopy of U373 stably expressing AP2-eGFP (green)  
 199 and transiently expressing FA-associated proteins fused to the fluorescent protein mCherry  
 200 (red): mCherry-vinculin (a), mCherry-FAK (b), or mCherry-paxillin (c). Left: Overview of a  
 201 representative migrating cell at time 0 and a later time point (190, 100, or 170 minutes,  
 202 respectively). Merged images of the FA protein signal at time 0 (red) and the AP2-eGFP  
 203 signal at the later time point (green). Right: Zoom on FAs that switch to clathrin-coated  
 204 plaques. Scale bars: 10  $\mu\text{m}$  (overview), 2  $\mu\text{m}$  (zoom).

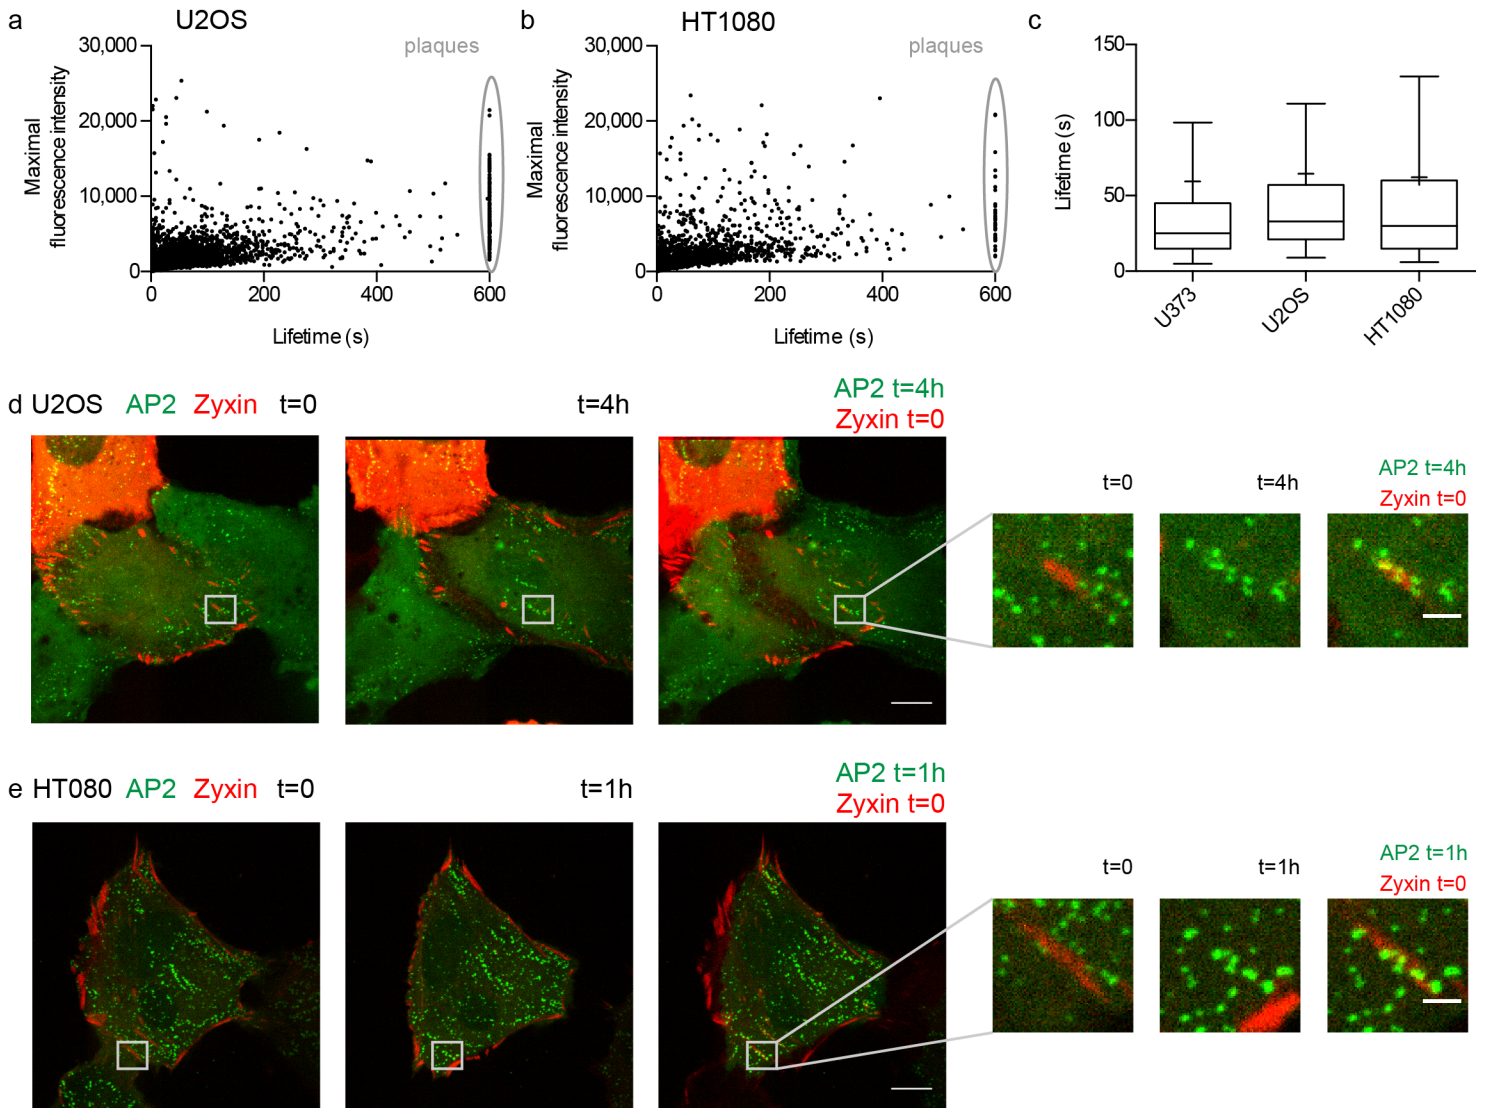

205 **Supplementary Figure 4: Switch from FAs to clathrin-coated plaques in U2OS and**  
 206 **HT1080 cells.**

207 Lifetime versus maximal fluorescence intensity of AP2-eGFP of CME tracks for U2OS (a) and  
 208 HT1080 (b). Shown are plots of a representative cell. Each dot represents one CME event in  
 209 a 10 minute long movie. Number of tracks: 5,492 (U2OS) and 3,287 (HT1080). (c) Box and  
 210 whiskers plot showing the lifetime distributions of CME in U373, U2OS, and HT1080  
 211 computed from three to four cells for each cell line. Whiskers represent 10-90 percentile,  
 212 box represents second and third quartile, the line marks the median, and the cross marks  
 213 the mean. Number of tracks: 4,472 (U373), 19,366 (U2OS), and 7,144 (HT1080). Live-cell  
 214 confocal spinning disc microscopy of U2OS (d) and HT1080 (e) stably expressing AP2-  
 215 eGFP (green) and transiently expressing mCherry-zyxin (red). Left: Overview of a

216 representative migrating cell at time 0 and a later time point (4 hours and 1 hour for U2OS  
217 and HT1080, respectively). Merged image of the mCherry-zyxin signal at time 0 (red) and  
218 the AP2-eGFP signal at the later time point (green). Right: Zoom on FAs that switch to  
219 clathrin-coated plaques. Scale bars: 10  $\mu\text{m}$  (overview), 2  $\mu\text{m}$  (zoom).

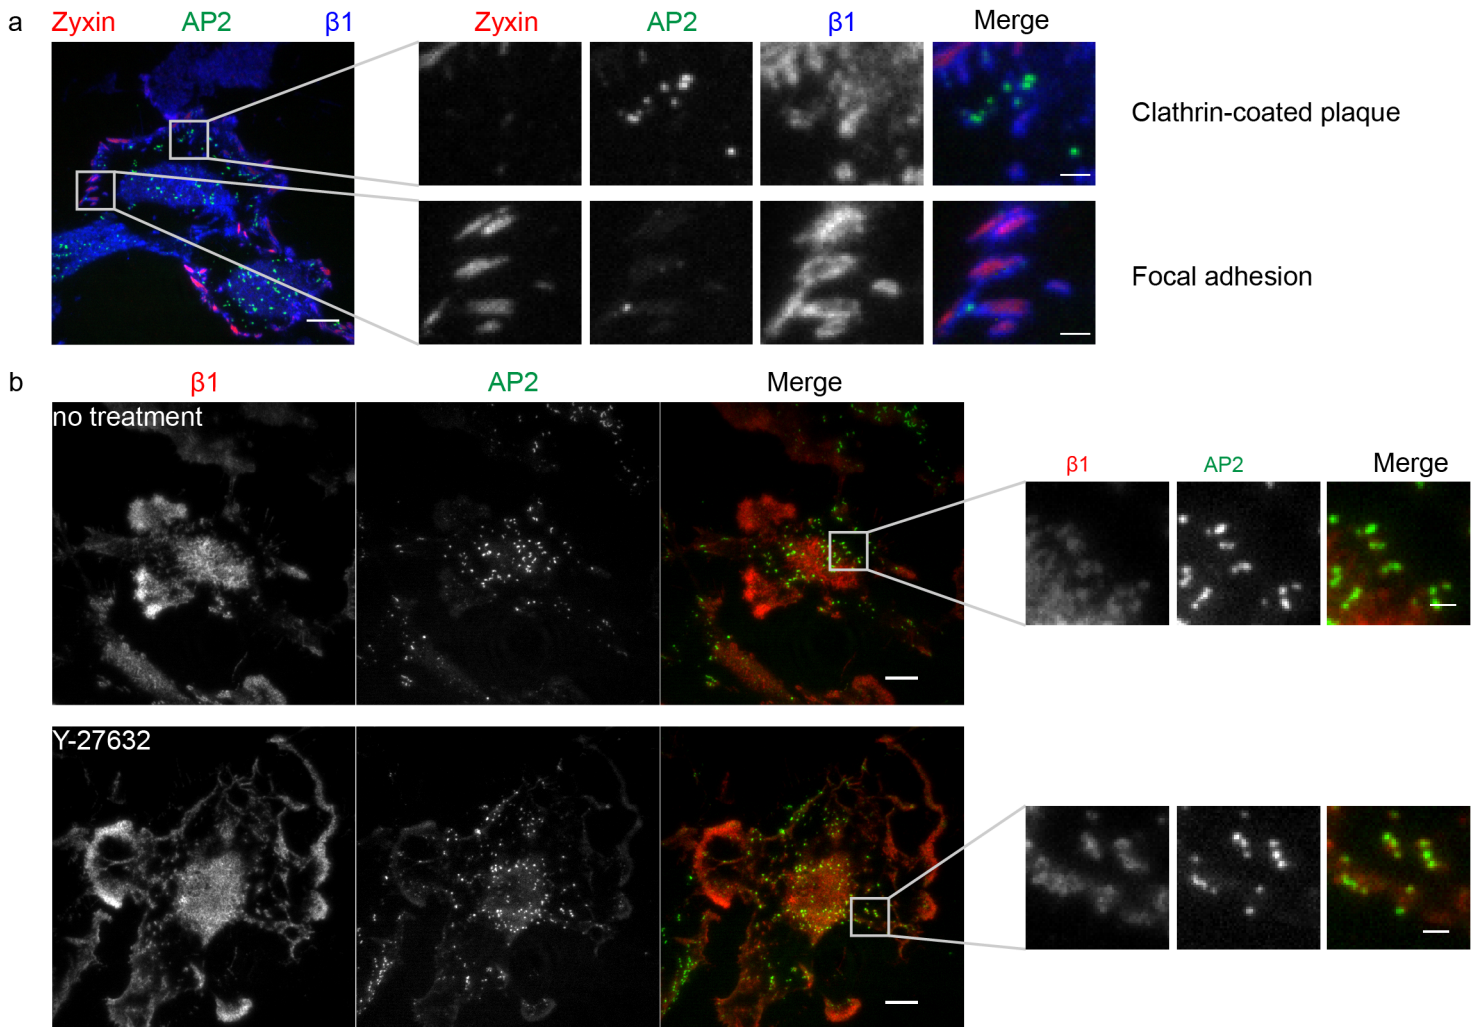

220 **Supplementary Figure 5: Enrichment of  $\beta$ 1 integrin at clathrin-coated plaques.**

221 (a) Representative image from total internal reflection fluorescence (TIRF) microscopy of  
 222 U373 stably expressing AP2-eGFP (green) and transiently expressing mCherry-zyxin (red)  
 223 immunostained for  $\beta$ 1 integrin (blue). Right: Zoom on clathrin-coated plaques marked by  
 224 bright AP2-eGFP signal (upper panel) and on FAs marked by mCherry-zyxin (lower panel).  
 225 (b) Representative image from TIRF microscopy of U373 stably expressing AP2-eGFP  
 226 (green) immunostained for integrin  $\beta$ 1 (red) untreated (upper panel) or treated with  
 227 Y25632 (10  $\mu$ M) for 30 minutes (lower panel). Right: Zoom on clathrin-coated plaques.  
 228 Scale bars: 10  $\mu$ m (overview), 2  $\mu$ m (zoom).

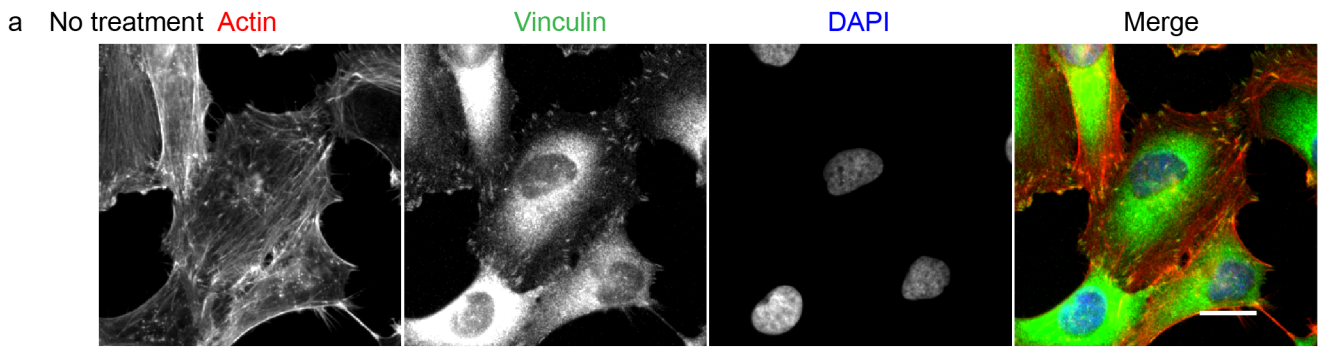

Inhibitor treatment

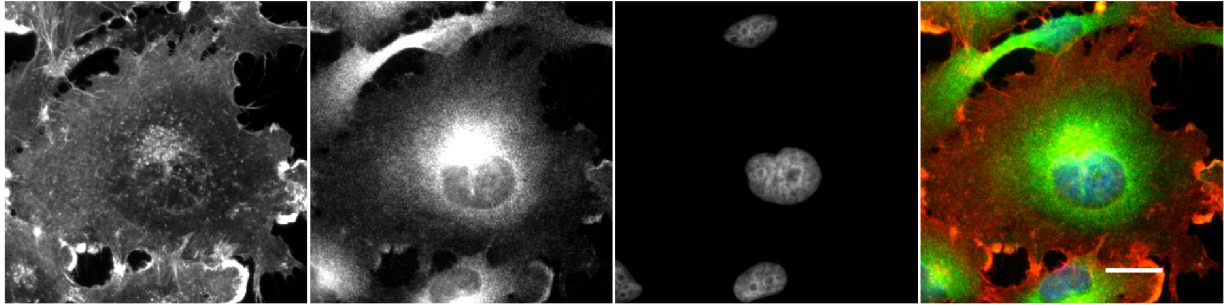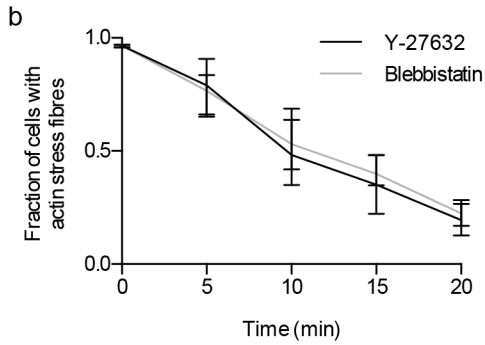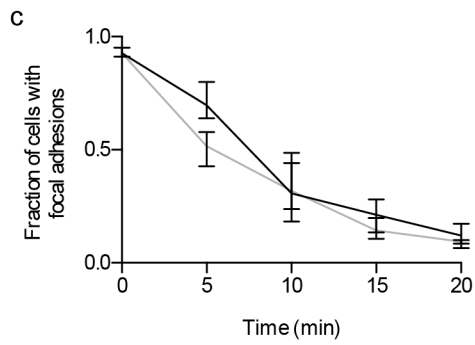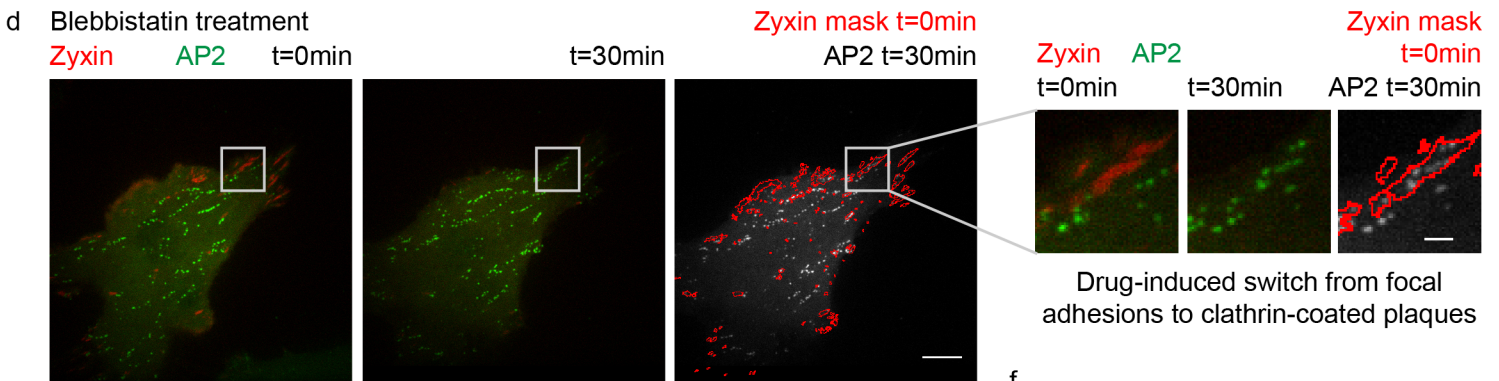

Drug-induced switch from focal adhesions to clathrin-coated plaques

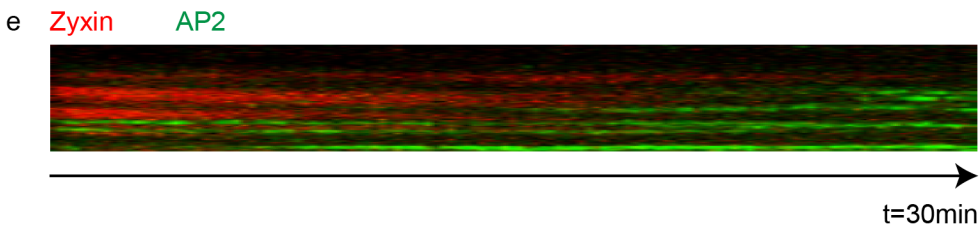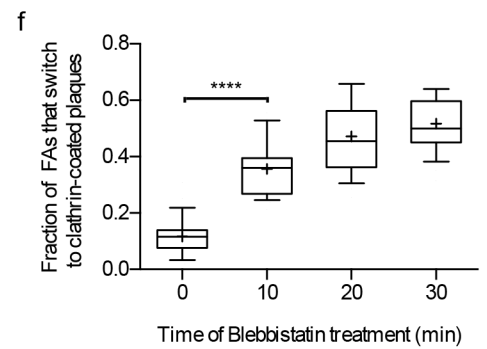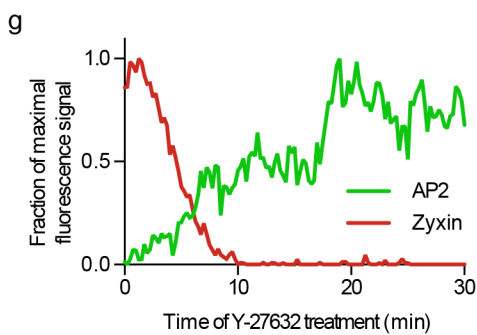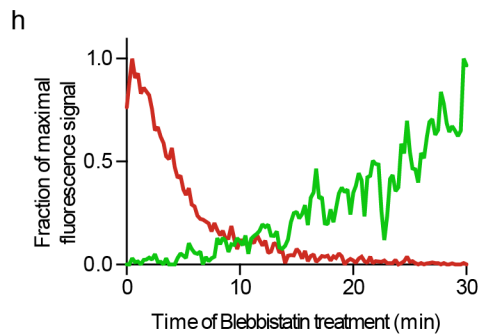



230 **Supplementary Figure 6: Drug-induced FA disassembly leads to switch to clathrin-**  
231 **coated plaques.**

232 (a) Representative images of widefield microscopy of untreated (upper panel) and inhibitor  
233 treated (lower panel) U373 cells stained for actin with Alexa Fluor 647-labelled  
234 phalloidin (red), vinculin (green) and DNA with DAPI (blue). Scale bar: 10  $\mu\text{m}$ . Kinetics of  
235 stress fibre (b) and FA (c) disassembly by treatment with Y-27632 (10  $\mu\text{M}$ , black) or  
236 Blebbistatin (20  $\mu\text{M}$ , grey). The graph shows the mean with SD of each time point. The  
237 results are computed from three independent experiments with over a hundred cells per  
238 experiment. (d) Live-cell confocal spinning disc microscopy of representative U373 cell  
239 stably expressing AP2-eGFP (green) and transiently expressing mCherry-zyxin (red) treated  
240 with Blebbistatin (20  $\mu\text{M}$ ). Cell before (left) and 30 minutes after drug treatment (middle).  
241 (Right) Merged images of a mask marking the mCherry-zyxin objects before (red) and the  
242 AP2-eGFP signal after Blebbistatin treatment (green). Right: Zoom on FA that switches to  
243 clathrin-coated plaques during the treatment. (e) Kymograph of the switch from FAs to  
244 clathrin-coated plaques shown in d over 30 minutes of Blebbistatin treatment.  
245 (f) Quantification of the switch from FAs to clathrin-coated plaques during Blebbistatin  
246 treatment. Whiskers represent 10-90 percentile, box represents second and third quartile,  
247 line marks the median and cross the mean. Results are computed from three repetitions.  
248 Statistical analysis: t test,  $n=30$ ,  $P<0.01$ . Normalized fluorescence intensity profiles of AP2-  
249 eGFP (green) and mCherry-zyxin (red) of a representative switch from FA to clathrin-coated  
250 plaques during Y-27632 (g) and Blebbistatin (h) treatment.

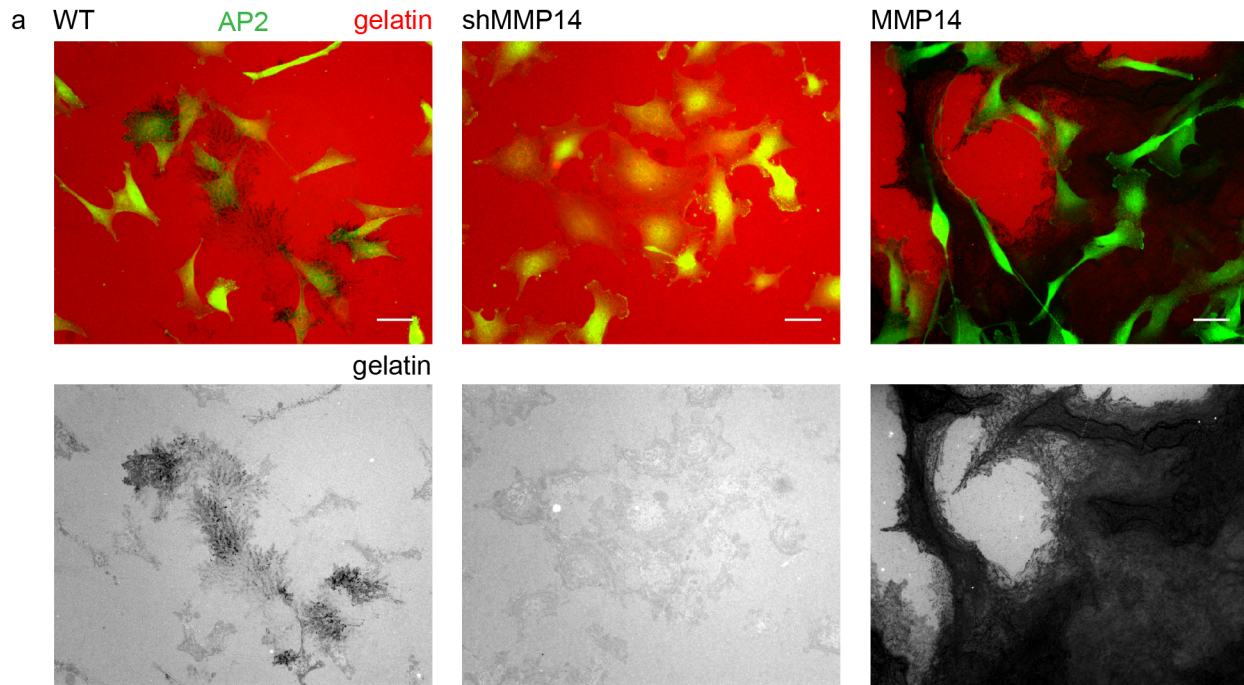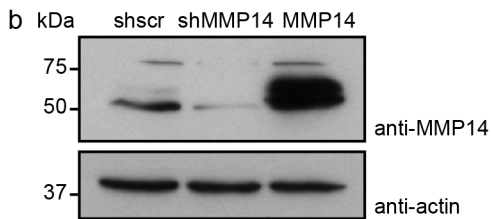

251 **Supplementary Figure 7: Gelatin digestion of U373 depends on MMP14.**

252 (a) Representative images of widefield microscopy of U373 stably expressing AP2-  
 253 eGFP (green) wild-type (WT), stable knock down for MMP14 (shMMP14), or stable  
 254 overexpression of MMP14 (MMP14) on coverslips coated with Alexa Fluor 647-labelled  
 255 gelatin (red). Scale bar: 10  $\mu$ m. (b) Western blot showing the protein level of MMP14 of  
 256 U373 cell lines stably expressing shscrambled (shscr), shMMP14, and overexpressing  
 257 MMP14. The protein levels of actin were used as loading control.

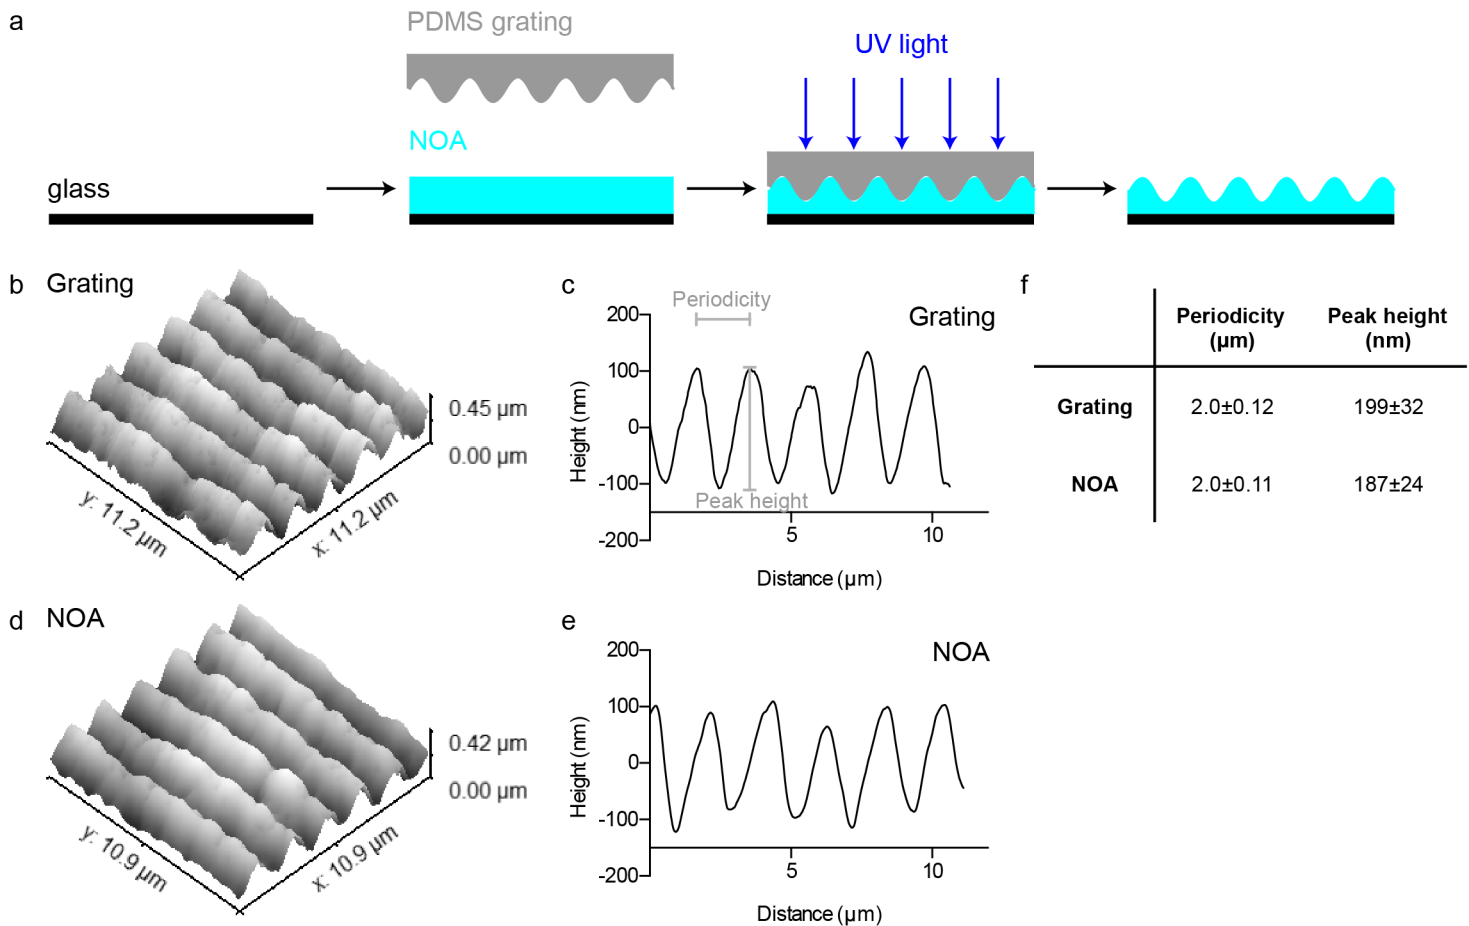

258 **Supplementary Figure 8: Production of optically clear 3D-micropattern.**

259 (a) Schematic illustrates the production of optically clear 3D-micropatterns. First, a drop of  
 260 optically clear adhesive (NOA, turquoise) was added on a glass coverslip and sandwiched by  
 261 a PDMS grating (grey) generated from a diffraction grating. The optically clear adhesive was  
 262 cured by UV-irradiation and finally, the PDMS grating was peeled from the optically clear  
 263 3D-micropatterns. Comparison of the topography of the diffraction gratings (b-c) and the  
 264 optically clear 3D-micropatterns (d-e) by atomic force microscopy (AFM). 3D-  
 265 representation of the topography of diffraction gratings (b) and optically clear 3D-  
 266 micropatterns (d). (c and e) Line profile of the topography shown in b and d. Periodicity and  
 267 peak height are marked. (f) Table lists the average periodicity and the peak height of  
 268 diffraction gratings and optically clear 3D-micropatterns. Shown are the mean with SD,  
 269 computed from three AFM measurements, with  $n=25$  (periodicity) and  $n=28$  (peak height).

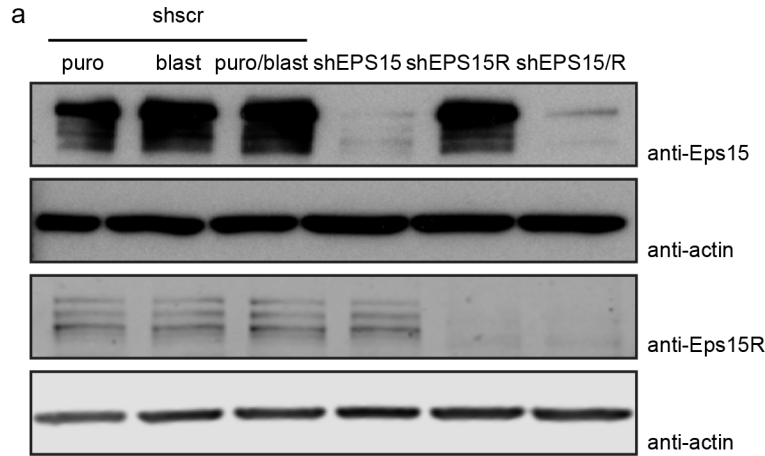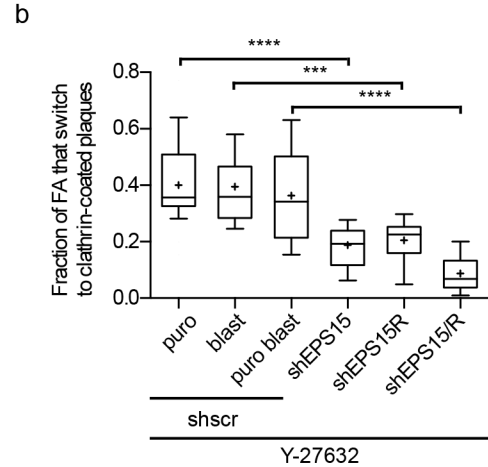

270 **Supplementary Figure 9: Eps15/R depletion reduces the efficiency of the switch from**  
 271 **FAs to clathrin-coated plaques.**

272 (a) Western blot showing the protein level of Eps15 (top) and Eps15R (bottom) of U373 cell  
 273 lines stably expressing shscrambled (shscr), shEPS15, shEPS15R and shEPS15 together  
 274 with shEPS15R (shEPS15/R). The protein levels of actin were used as loading control. (b)  
 275 Normalized quantification of the switch from FAs to clathrin-coated plaques after 20  
 276 minutes of Y-27632 treatment of U373 shEPS15, shEPS15R and shEPS15/R. Data was  
 277 normalized to the mean of U373 stably expressing the corresponding shscr. Shown is the  
 278 mean with SD computed from three repetitions. Statistical analysis: t test, n=28 (shscr  
 279 puro), n=30 (shscr blast), n=24 (shscr puro blast), n=30 (shEPS15), n=25 (shEPS15R), n=29  
 280 (shEPS15/R),  $P < 0.01$ .

281 ***Supplementary References***

- 282 1. Bucher, D. *et al.* Clathrin-adaptor ratio and membrane tension regulate the flat-to-  
283 curved transition of the clathrin coat during endocytosis. *Nat. Commun.* **9**, 1109  
284 (2018).
- 285 2. Pitaval, A., Christ, A., Curtet, A., Tseng, Q. & Théry, M. in *Cilia, Part B* (ed. Marshall, W.  
286 F. B. T.-M. in E.) **525**, 109–130 (Academic Press, 2013).

287
